# Supplementary material for: Cell membrane glycan contents are biochemical factors that constitute a kinetic barrier to viral particle uptake in a protein-nonspecific manner
Source: eLife. 2025 Oct 28;14:RP101175. doi: 10.7554/eLife.101175 (PMC12563552; doi:10.7554/eLife.101175)
Supplement: Supplementary file 3. [file elife-101175-supp3.xlsx]

## Sheet: Sheet1
UniProt Entry	Protein #	Gene name	Protein names	Total Etcodomain (AA)	# of membrane-spanning	Max Etcodomain (AA)	GlycoEP(N,O) Predicted Glycosylation /AA	Net N/O Glyc Predicted Glycosylation /AA	Mean (Glyco EP & Net N/O Glyc)
P15941		MUC1	MUC1 0TR(del840)	294	1	294	0.27551	0.227891	0.251701
P15941		MUC1	MUC1 4TR(del760)	374	1	374	0.26738	0.229947	0.248663
P15941		MUC1	MUC1 14TR(del560)	574	1	574	0.261324	0.236934	0.249129
Q9JI71		Dll4	Delta-like protein 4 (Drosophila Delta homolog 4) (Delta4)	505	1	505	0.0613861	0.0554455	0.0584158
Q9QXX0		Jag1	Protein jagged-1 (Jagged1) (hJ1) (CD antigen CD339)	1033	1	1033	0.0561471	0.0106486	0.0333979
